# Supplementary material
Source: MDPI journal article supplement (https://www.mdpi.com/1999-4907/13/3/376)
Supplement: s1 [file s1]

## Supporting information:

**Table S1.** Regression analysis between plant diversity and environmental variables (2012&2019).

|                                     | $\beta$ -Coefficient | t value | Pr(> t ) | Multiple R2 | Cohen's F2 |
|-------------------------------------|----------------------|---------|----------|-------------|------------|
| <b>Year-2012</b>                    |                      |         |          |             |            |
| Shannon Index<br>(Intercept)        | 3.47                 | 5.94    | 0.00     | 0.01        | 0.01       |
| pH                                  | 0.01                 | 0.18    | 0.87     |             |            |
| OM                                  | 0.02                 | 0.22    | 0.83     |             |            |
| TN                                  | -0.16                | -0.46   | 0.66     |             |            |
| TP                                  | -1.75                | -0.35   | 0.74     |             |            |
| Simpson Index<br>(Intercept)        | 0.93                 | 18.6    | 0.00     | 0.01        | 0.01       |
| pH                                  | 0.01                 | 0.43    | 0.67     |             |            |
| OM                                  | 0.01                 | 0.67    | 0.52     |             |            |
| TN                                  | -0.02                | -0.47   | 0.65     |             |            |
| TP                                  | 0.06                 | 0.13    | 0.91     |             |            |
| Species Richness<br>(Intercept)     | 109.54               | 3.99    | 0.01     | 0.05        | 0.05       |
| pH                                  | -6.64                | -1.37   | 0.18     |             |            |
| OM                                  | -2.92                | -1.3    | 0.21     |             |            |
| TN                                  | -0.42                | -0.03   | 0.98     |             |            |
| TP                                  | <b>31.28</b>         | 0.13    | 0.90     |             |            |
| Pielou's<br>Evenness<br>(Intercept) | 0.71                 | 6.03    | 0.00     | 0.04        | 0.04       |
| pH                                  | 0.03                 | 1.09    | 0.29     |             |            |
| OM                                  | 0.02                 | 1.29    | 0.21     |             |            |
| TN                                  | -0.04                | -0.52   | 0.62     |             |            |
| TP                                  | -0.46                | -0.45   | 0.66     |             |            |
| <b>Year-2019</b>                    |                      |         |          |             |            |
| Shannon Index<br>(Intercept)        | 4.49                 | 4.69    | 0.00     | 0.27        | 0.38       |
| pH                                  | -0.19                | -1.0163 | 0.31     |             |            |
| OM                                  | 0.00                 | 0.0943  | 0.92     |             |            |
| TN                                  | 2.8                  | 1.0494  | 0.29     |             |            |
| TP                                  | -34.66               | -4.1638 | 0.00***  |             |            |
| Simpson Index<br>(Intercept)        | 1.14                 | 9.44    | 0.00     | 0.21        | 0.27       |
| pH                                  | -0.03                | -1.47   | 0.14     |             |            |
| OM                                  | -0.00                | -0.16   | 0.86     |             |            |
| TN                                  | 0.30                 | 0.89    | 0.37     |             |            |
| TP                                  | -3.53                | -3.35   | 0.00***  |             |            |

|                                     |               |       |         |      |      |
|-------------------------------------|---------------|-------|---------|------|------|
| Species Richness<br>(Intercept)     | 44.66         | 1.25  | 0.21    | 0.37 | 0.59 |
| pH                                  | 3.77          | 0.53  | 0.59    |      |      |
| OM                                  | 2.42          | 0.74  | 0.46    |      |      |
| TN                                  | <b>101.89</b> | 1.02  | 0.30    |      |      |
| TP                                  | -1,651.79     | -5.35 | 0.00*** |      |      |
| Pielou's<br>Evenness<br>(Intercept) | 0.90          | 8.29  | 0.00    | 0.07 | 0.08 |
| pH                                  | -0.01         | -0.87 | 0.38    |      |      |
| OM                                  | -0.00         | -0.39 | 0.69    |      |      |
| TN                                  | -0.00         | -0.01 | 0.98    |      |      |
| TP                                  | 1.81          | 1.91  | 0.06    |      |      |

Note: Significant codes: 0 '\*\*\*' 0.001 '\*\*' 0.01 '\*' 0.05 '.' 0.1 '' 1. OM: organic matter; TN: total nitrogen; TP: total phosphorus and pH, Pr(>|t|): p-value for the t-test.

**Table S2. Species IVIs for year 2012**

| Species                            | Dominanc<br>e | Frequency | Density | Relative<br>dominance | Relative<br>frequency | Relative<br>density | IVI    |
|------------------------------------|---------------|-----------|---------|-----------------------|-----------------------|---------------------|--------|
| <i>Schefflera octophylla</i>       | 24.77         | 1037      | 63      | 30.274                | 11.010                | 10.500              | 51.783 |
| <i>Acronychia oligophlebia</i>     | 11.08         | 772       | 64      | 13.541                | 8.196                 | 10.667              | 32.404 |
| <i>Syzygium buxifolium</i>         | 9.58          | 1458      | 64      | 11.708                | 15.479                | 10.667              | 37.854 |
| <i>Acmena acuminatissima</i>       | 8.30          | 1069      | 62      | 10.140                | 11.349                | 10.333              | 31.823 |
| <i>Olea dioica</i>                 | 7.68          | 1664      | 63      | 9.388                 | 17.666                | 10.500              | 37.554 |
| <i>Eiacocarpus sylvestri</i>       | 5.36          | 176       | 48      | 6.546                 | 1.869                 | 8.000               | 16.415 |
| <i>Syzygium<br/>buxifolioideum</i> | 4.36          | 372       | 54      | 5.325                 | 3.949                 | 9.000               | 18.275 |
| <i>Xantolis longispinosa</i>       | 3.59          | 1854      | 64      | 4.389                 | 19.684                | 10.667              | 34.739 |
| <i>Prunus phaeocosticta</i>        | 3.56          | 308       | 55      | 4.357                 | 3.270                 | 9.167               | 16.793 |
| <i>Litsea variabilis</i>           | 3.54          | 709       | 63      | 4.331                 | 7.527                 | 10.500              | 22.359 |

**Table S3. Species IVIs for year 2019**

| Species                        | Dominanc<br>e | Frequenc<br>y | Densit<br>y | Relative<br>dominanc<br>e | Relative<br>frequenc<br>y | Relative<br>density | IVI     |
|--------------------------------|---------------|---------------|-------------|---------------------------|---------------------------|---------------------|---------|
| <i>Hydnocarpus hainanensis</i> | 2163.01       | 1198          | 53          | 89.457                    | 11.029                    | 9.532               | 110.018 |
| <i>Acmena acuminatissima</i>   | 58.12         | 1156          | 61          | 2.404                     | 10.643                    | 10.971              | 24.018  |
| <i>Antirhea chinensis</i>      | 35.29         | 304           | 39          | 1.460                     | 2.799                     | 7.014               | 11.273  |
| <i>Camellia furfuracea</i>     | 34.96         | 1061          | 58          | 1.446                     | 9.768                     | 10.432              | 21.646  |
| <i>Schefflera octophylla</i>   | 23.96         | 1165          | 61          | 0.991                     | 10.725                    | 10.971              | 22.688  |
| <i>Koilolepas hainanense</i>   | 23.90         | 1193          | 56          | 0.988                     | 18.348                    | 10.072              | 29.409  |
| <i>Olea dioica</i>             | 21.83         | 1268          | 62          | 0.903                     | 11.674                    | 11.151              | 23.728  |
| <i>Syzygium buxifolium</i>     | 19.16         | 1114          | 48          | 0.793                     | 10.256                    | 8.633               | 19.682  |
| <i>Litsea verticillata</i>     | 18.97         | 989           | 61          | 0.785                     | 9.105                     | 10.971              | 20.861  |
| <i>Aeronychia oligophlebia</i> | 18.73         | 614           | 57          | 0.774                     | 5.653                     | 10.252              | 16.679  |

**Equations for Calculation**

$$\text{Frequency (F)} = \frac{\text{No. of Quadrats in which species occurred}}{\text{Total number of quadrat studied}} \times 100$$

$$\text{Relative Frequency (R.F)} = \frac{\text{Frequency of occurrence of species}}{\text{Total frequency of occurrence of all species}} \times 100$$

$$\text{Relative Density (R. Den.)} = \frac{\text{Number of individuals of the species}}{\text{Total number of individuals of all species}} \times 100$$

$$\text{Relative Dominance (R.D.)} = \frac{\text{Total Basal area of a specie}}{\text{Total Basal area of all species}} \times 100$$

(Panwar and Bhardwaj,2012)

Figure 2, scientific names

Dominant species in 2012 (Figure 2A)

Sp1. *Xantolis longispinosa*,

Sp2. *Stertulia lanceolata*,

Sp3. *Hydnocarpus hainanensis*  
Sp4. *Antirhea chinesis*  
Sp5. *Syzygium tephrodes*  
Sp6. *Schefflera octophylla*  
Sp7. *Lithocarpus corneus*  
Sp8. *Arytera littoralis*  
Sp9. *Cleistanthus saichikii*  
Sp10. *Hydnocarpus hainanensis*  
Sp11. *Bridelia balansae*  
Sp12. *Litsea verticillate*  
Sp13. *Prunus phacostica*  
Sp14. *Aporosa yunnanensis*  
Sp15. *Mallotus hookerianus*  
Sp16. *Antirhea chinensis*  
Sp17. *Syzygium odoratum*  
Sp18. *Camellia furfuracea*  
Sp19. *Dillenia turbinata*  
Sp20. *Olea dioica*

*Dominant species in 2019 (Figure 2B).*

Sp21. *Arytera littoralis*  
Sp22. *Stertulia lanceolata*  
Sp23. *Litsea variabilis*  
Sp24. *Syzygium claviflorum*  
Sp25. *Syzygium championii*  
Sp26. *Bridelia balansae*  
Sp27. *Acmena acuminatissima*  
Sp28. *Hydnocarpus hainanensis*  
Sp29. *Camellia furfuracea*  
Sp30. *Aeronychia oligophlebia*

- Sp31. *Drypetes arcuatinervia*
- Sp32. *Koilocpas hainanense*
- Sp33. *Oncodostigma hainanense*
- Sp34. *Mallotus hookerianus*
- Sp35. *Eiacocarpus sylvestri*
- Sp36. *Casaria aequilateralis*
- Sp37. *Olea dioica*
- Sp38. *Syzygium buxifolium*
- Sp39. *Ancistrocladus tectorius*
- Sp40. *Psychotria rubra*
- Sp41. *Antirhea chinensis*
- Sp42. *Syzygium odoratum*
- Sp43. *Laurocerasus phaeosticta*
- Sp44. *Syzygium championii*
- Sp45. *Dillenia turbinata*
- Sp46. *Syzygium claviflorum*
- Sp47. *Cudrania cochinchinensis*
- Sp48. *Xantolis longispinosa*
- Sp49. *Syzygium tephrodes*
